# Supplementary material for: Inexpensive thermochemical energy storage utilising additive enhanced limestone
Source: Royal Society of Chemistry journal article supplement (doi:10.1039/d0ta03080e), 2020-01-01
Supplement: d0ta03080e1.pdf [file d0ta03080e1.pdf]

***Supporting Information:***

**Inexpensive Thermochemical Energy Storage Utilising Additive  
Enhanced Limestone**

Kasper T. Møller,<sup>1\*</sup> Ainee Ibrahim,<sup>1</sup> Craig E. Buckley,<sup>1</sup> Mark Paskevicius<sup>1\*</sup>

<sup>1</sup>*Physics and Astronomy, Fuels and Energy Technology Institute, Curtin University, GPO Box U1987, Perth 6845, WA, Australia.*

**\*Corresponding Authors**

Kasper T. Møller, kasper.moller@curtin.edu.au and Mark Paskevicius,  
mark.paskevicius@curtin.edu.au

**Table S1.** Overview of samples investigated.

| Primary           | Additive                       | Wt% additive | Mol% additive   | Vol% additive   | Comments                                                                                                                                                         |
|-------------------|--------------------------------|--------------|-----------------|-----------------|------------------------------------------------------------------------------------------------------------------------------------------------------------------|
| CaCO <sub>3</sub> | -                              | -            | -               | -               | Sigma-Aldrich (SA), ReagentPLUS                                                                                                                                  |
| CaCO <sub>3</sub> | C (graphite)                   | 20           | 67.6            | 23.0            | Hopkins & Williams, 98-99 %                                                                                                                                      |
| CaCO <sub>3</sub> | Al <sub>2</sub> O <sub>3</sub> | 10, 20, 40   | 9.8, 19.7, 39.6 | 7.1, 14.6, 31.4 | SA, Puriss. ≥98 % (bulk); nanopowder, 13 nm (TEM), 99.8 % (nano)                                                                                                 |
| CaCO <sub>3</sub> | SiO <sub>2</sub>               | 20           | 29.4            | 20.3            | SA, Nanopowder, 10-20 nm, 99.5 %                                                                                                                                 |
| CaCO <sub>3</sub> | Fe <sub>2</sub> O <sub>3</sub> | 20           | 13.5            | 11.5            | SA, nanopowder, <50 nm                                                                                                                                           |
| CaCO <sub>3</sub> | Ni                             | 20           | 29.9            | 7.1             | SA, <100 nm, ≥99 %                                                                                                                                               |
| CaCO <sub>3</sub> | ZnO                            | 20           | 23.5            | 10.8            | SA, dispersion, 40 wt% in EtOH, <130 nm                                                                                                                          |
| CaCO <sub>3</sub> | ZrO <sub>2</sub>               | 20, 40       | 16.9, 35.1      | 10.7, 24.1      | SA, nanopowder, <100 nm                                                                                                                                          |
| CaCO <sub>3</sub> | Zeolite Y, Na (NaY)            | 20           | 13.4            | 16.9            | Alfa Aesar (AA), 900 m/g, 5.1:1 SiO <sub>2</sub> :Al <sub>2</sub> O <sub>3</sub> molar ratio                                                                     |
| CaCO <sub>3</sub> | Zeolite Y, H (HY)              | 20           | 13.4            | 16.9            | AA, 780 m/g, 80:1 SiO <sub>2</sub> :Al <sub>2</sub> O <sub>3</sub> molar ratio                                                                                   |
| CaCO <sub>3</sub> | Zeolite Mordenite, Na (Mor)    | 20           | 13.4            | 16.9            | AA, 425 m/g, 13:1 SiO <sub>2</sub> :Al <sub>2</sub> O <sub>3</sub> molar ratio                                                                                   |
| CaCO <sub>3</sub> | BaCO <sub>3</sub>              | 9.5          | 5               | 6.1             | SA, ≥99 %. Deviates from the remainder of the samples due to a previously reported solid-solution regime for BaCO <sub>3</sub> -CaCO <sub>3</sub> . <sup>1</sup> |

**Table S2.** Overview of TG-DSC data, cyclic capacity, and reaction products observed after 50 calcination/carbonation cycles at 900 °C and  $p(\text{CO}_2)_{\text{calcination}} \sim 0.7$  bar and  $p(\text{CO}_2)_{\text{carbonation}} \sim 5$  bar.

| Primary           | Additive                                | TGA <sub>onset</sub> [°C] | Mass loss [%] | DSC <sub>peak</sub> [°C]                        | Crystalline products after 50 calcination/carbonation cycles                                                                                                 | CO <sub>2</sub> capacity after 50 calcination/carbonation cycles [%] |
|-------------------|-----------------------------------------|---------------------------|---------------|-------------------------------------------------|--------------------------------------------------------------------------------------------------------------------------------------------------------------|----------------------------------------------------------------------|
| CaCO <sub>3</sub> | -                                       | 560                       | 45.2          | 804 (endo)                                      | CaCO <sub>3</sub> , CaO                                                                                                                                      | 14.8                                                                 |
| CaCO <sub>3</sub> | C (graphite)                            | 610                       | 37.8          | 845 (endo)                                      | CaCO <sub>3</sub> , CaO,                                                                                                                                     | 19.7                                                                 |
| CaCO <sub>3</sub> | Al <sub>2</sub> O <sub>3</sub> (20 wt%) | 630                       | 36.3          | 830 (endo)                                      | CaCO <sub>3</sub> , CaO, Ca <sub>5</sub> Al <sub>6</sub> O <sub>14</sub> , CaAl <sub>2</sub> O <sub>4</sub> , Ca <sub>3</sub> Al <sub>2</sub> O <sub>6</sub> | 48.5                                                                 |
| CaCO <sub>3</sub> | SiO <sub>2</sub>                        | 555                       | 37.6          | 812 (endo)                                      | CaCO <sub>3</sub> , CaO, Ca <sub>5</sub> (SiO <sub>4</sub> ) <sub>2</sub> CO <sub>3</sub>                                                                    | 23.0                                                                 |
| CaCO <sub>3</sub> | Fe <sub>2</sub> O <sub>3</sub>          | 590                       | 36.1          | 820 (endo)                                      | CaCO <sub>3</sub> , CaO, Fe <sub>3</sub> O <sub>4</sub> , Ca <sub>2</sub> Fe <sub>2</sub> O <sub>5</sub>                                                     | 6.2                                                                  |
| CaCO <sub>3</sub> | Ni                                      | 631                       | 31.9          | 784 (endo)                                      | CaCO <sub>3</sub> , CaO, Ni                                                                                                                                  | 11.1                                                                 |
| CaCO <sub>3</sub> | ZnO                                     | 625                       | 39.7          | 837 (endo)                                      | CaCO <sub>3</sub> , CaO                                                                                                                                      | 5.4                                                                  |
| CaCO <sub>3</sub> | ZrO <sub>2</sub> (20 wt%)               | 612                       | 36.2          | 843 (endo)                                      | CaCO <sub>3</sub> , CaO, CaZrO <sub>3</sub>                                                                                                                  | 52.4                                                                 |
| CaCO <sub>3</sub> | ZrO <sub>2</sub> (40 wt%)               | 610                       | 27.4          | 810 (endo)                                      | CaCO <sub>3</sub> , CaO, CaZrO <sub>3</sub>                                                                                                                  | 35.5                                                                 |
| CaCO <sub>3</sub> | NaY                                     | 580                       | 35.7          | 763 (endo)                                      | CaCO <sub>3</sub> , CaO, Ca <sub>5</sub> (SiO <sub>4</sub> ) <sub>2</sub> CO <sub>3</sub>                                                                    | 18.2                                                                 |
| CaCO <sub>3</sub> | HY                                      | 606                       | 36.7          | 832 (endo)                                      | CaCO <sub>3</sub> , CaO, Ca <sub>5</sub> (SiO <sub>4</sub> ) <sub>2</sub> CO <sub>3</sub>                                                                    | 12.9                                                                 |
| CaCO <sub>3</sub> | Mor                                     | 635                       | 37.3          | 836 (endo)                                      | CaCO <sub>3</sub> , CaO, Ca <sub>5</sub> (SiO <sub>4</sub> ) <sub>2</sub> CO <sub>3</sub>                                                                    | 12.0                                                                 |
| CaCO <sub>3</sub> | 0.05 BaCO <sub>3</sub>                  | 646                       | 41.8          | 643 (endo), 759 (endo), 851 (endo), 1124 (endo) | CaCO <sub>3</sub> , CaO, BaCO <sub>3</sub> , BaCa(CO <sub>2</sub> ) <sub>3</sub>                                                                             | 7.3                                                                  |

**Table S3.** Parameters extracted from Rietveld refinement on the *in situ* data of CaCO<sub>3</sub>-ZrO<sub>2</sub> (40 wt%) sample. The wt% of each compound is given and where possible, crystallite size was extracted and is given in parentheses.

| Scan/compound       | CaCO <sub>3</sub> [wt%]<br>(crystallite size,<br>nm) | CaO [wt%]<br>(crystallite size,<br>nm) | CaZrO <sub>3</sub> [wt%]<br>(crystallite size,<br>nm) | ZrO <sub>2</sub> [wt%]<br>(crystallite size,<br>nm) |
|---------------------|------------------------------------------------------|----------------------------------------|-------------------------------------------------------|-----------------------------------------------------|
| 0                   | 46 (115)                                             | 3 (50)                                 | 15 (6.7)                                              | 36                                                  |
| 18 (calcinated)     | 14 (422)                                             | 13 (161)                               | 65 (19.6)                                             | 8                                                   |
| 32 (carbonated)     | 28.8 (245)                                           | 0.4                                    | 65.8 (23)                                             | 5                                                   |
| 51 (calcinated)     | 10 (565)                                             | 13 (171)                               | 74 (24)                                               | 3                                                   |
| 63 (carbonated)     | 26 (227)                                             | 0.4                                    | 71 (26)                                               | 2.6                                                 |
| 83 (calcinated)     | 9                                                    | 12 (159)                               | 77 (27)                                               | 2                                                   |
| 94 (carbonated)     | 25 (234)                                             | 0.5                                    | 73 (28)                                               | 1.5                                                 |
| 113 (calcinated)    | 9.5                                                  | 12 (147)                               | 77 (29)                                               | 1.5                                                 |
| 126<br>(carbonated) | 25 (204)                                             | 0                                      | 73.5 (26)                                             | 1.5                                                 |
| 146 (calcinated)    | 9.4                                                  | 12 (125)                               | 77.4 (27)                                             | 1.2                                                 |
| 155<br>(carbonated) | 25 (206)                                             | 0.5                                    | 73.5 (27)                                             | 1                                                   |

**Table S4.** Specific surface area determined by SAXS for relevant samples.

| Sample                                                          | Specific Surface Area (m <sup>2</sup> ·g <sup>-1</sup> ) | CO <sub>2</sub> cycles | Comments  |
|-----------------------------------------------------------------|----------------------------------------------------------|------------------------|-----------|
| CaCO <sub>3</sub>                                               | 1.9(2)                                                   | 0                      | As-milled |
| CaCO <sub>3</sub>                                               | 4.0(4)                                                   | 50                     | Absorbed  |
| CaCO <sub>3</sub>                                               | 3.9(4)                                                   | 50                     | Desorbed  |
| CaCO <sub>3</sub> -Al <sub>2</sub> O <sub>3</sub> (20wt%, nano) | 29(3)                                                    | 0                      | As-milled |
| CaCO <sub>3</sub> -Al <sub>2</sub> O <sub>3</sub> (20wt%, nano) | 3.7(4)                                                   | 50                     | Absorbed  |
| CaCO <sub>3</sub> -Al <sub>2</sub> O <sub>3</sub> (20wt%)       | 3.7(4)                                                   | 0                      | As-milled |
| CaCO <sub>3</sub> -Al <sub>2</sub> O <sub>3</sub> (20wt%)       | 1.2(1)                                                   | 50                     | Absorbed  |
| CaCO <sub>3</sub> -Al <sub>2</sub> O <sub>3</sub> (20wt%)       | 1.2(1)                                                   | 500                    | Absorbed  |
| CaCO <sub>3</sub> -ZrO <sub>2</sub> (40wt%)                     | 52(5)                                                    | 0                      | As-milled |
| CaCO <sub>3</sub> -ZrO <sub>2</sub> (40wt%)                     | 3.1(3)                                                   | 50                     | Absorbed  |
| CaCO <sub>3</sub> -ZrO <sub>2</sub> (40wt%)                     | 4.7(5)                                                   | 100                    | Absorbed  |

## Thermal Analysis

TG-DSC data of the samples reveal that the CaCO<sub>3</sub> in all cases decomposes between 763 – 851 °C under argon flow, see Figure S1, S2 and Table S2. This is a positive observation, as a high decomposition temperature is sought and thus destabilisation of the material is not preferable. The as-milled CaCO<sub>3</sub> has an endothermic DSC peak signal at 804 °C, which is in the middle of the observed decomposition range. A slight destabilisation in the NaY sample is probably due a reaction between SiO<sub>2</sub> (in the zeolite structure) and CaCO<sub>3</sub> to form spurrite, Ca<sub>5</sub>(SiO<sub>2</sub>)<sub>4</sub>CO<sub>3</sub>, according to reaction scheme S1:

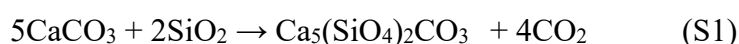

(c.f. the results on powder X-ray diffraction). However, as the NaY sample decomposes earlier than the purely added SiO<sub>2</sub> sample the destabilisation is assigned to the Al<sub>2</sub>O<sub>3</sub>. Contrary to this, the thermal stability of, e.g. BaCO<sub>3</sub> ( $T_{\text{dec}} > 1100$  °C) seems to increase the decomposition temperature to 851 °C. Finally, small differences in particle size as a function of ball-milling may also cause the minor differences observed.

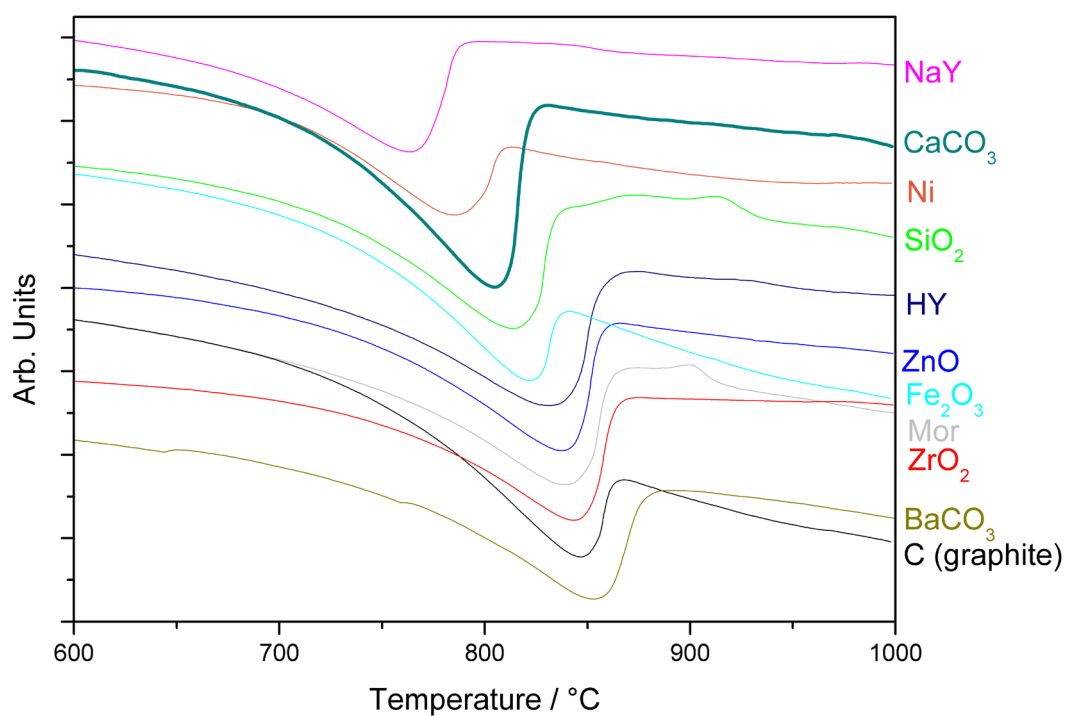

**Figure S1.** Comparison of the DSC data between 600 and 1000 °C of the investigated samples, which show that the samples generally decompose within the temperature range 763 – 851 °C.

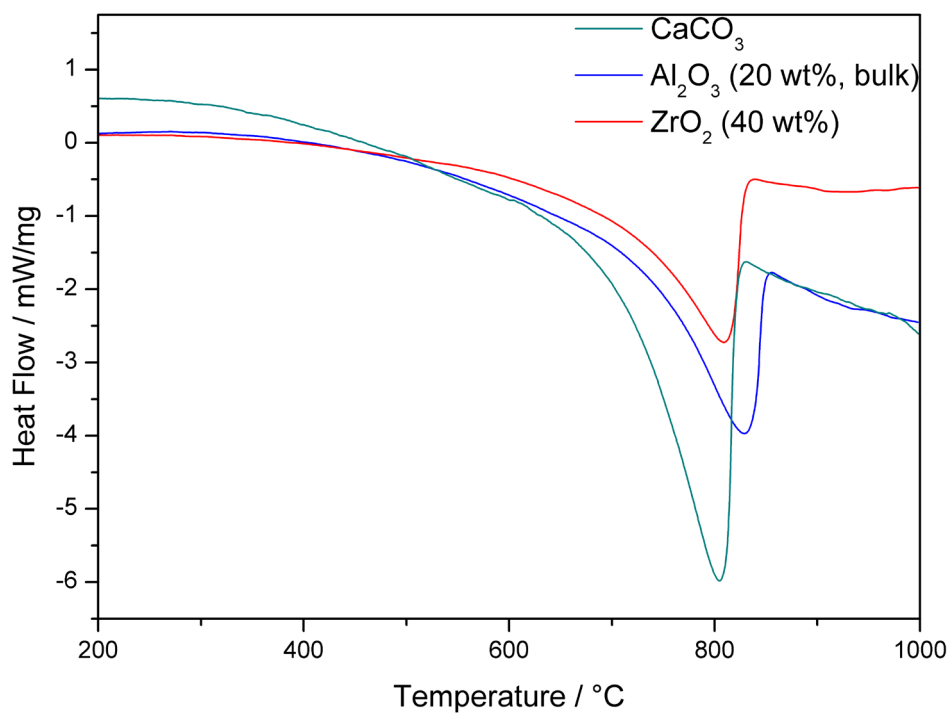

**Figure S2.** Comparison of the DSC data for the most promising samples containing  $\text{CaCO}_3$ - $\text{Al}_2\text{O}_3$  (20 wt%) and  $\text{CaCO}_3$ - $\text{ZrO}_2$  (40 wt%).

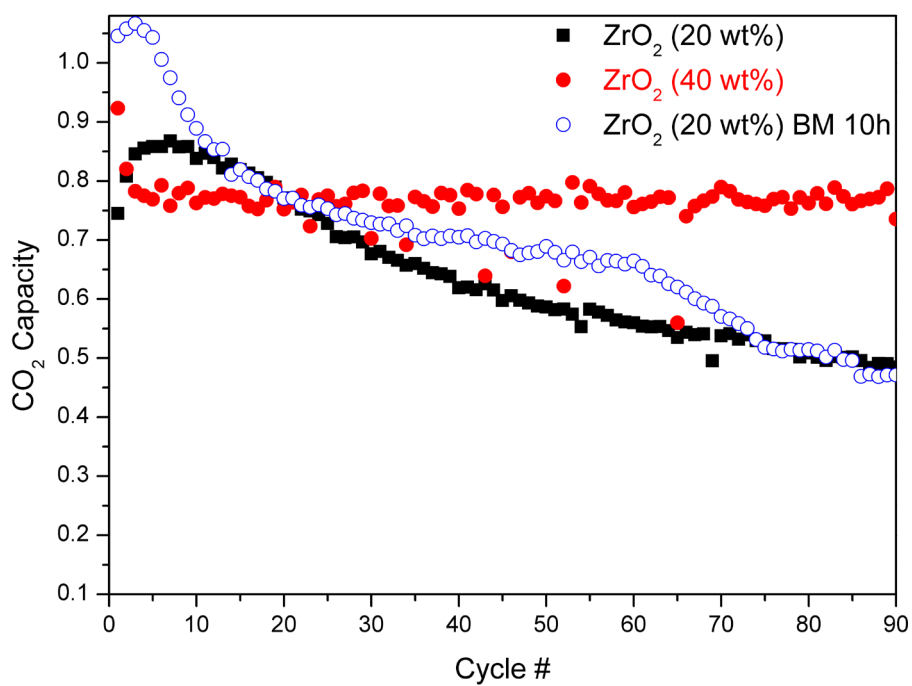

**Figure S3.** Absorption data comparing the influence of ZrO<sub>2</sub> content and ball-milling parameters over 90 calcination-carbonation cycles. The data has been corrected for reacted material to form CaZrO<sub>3</sub>. Hence, when adding 20 or 40 wt% ZrO<sub>2</sub>, 69 or 32 wt% CaCO<sub>3</sub>, respectively, will be left after the reaction, which is then set as 100 %, *i.e.* 1 mol of CO<sub>2</sub>.

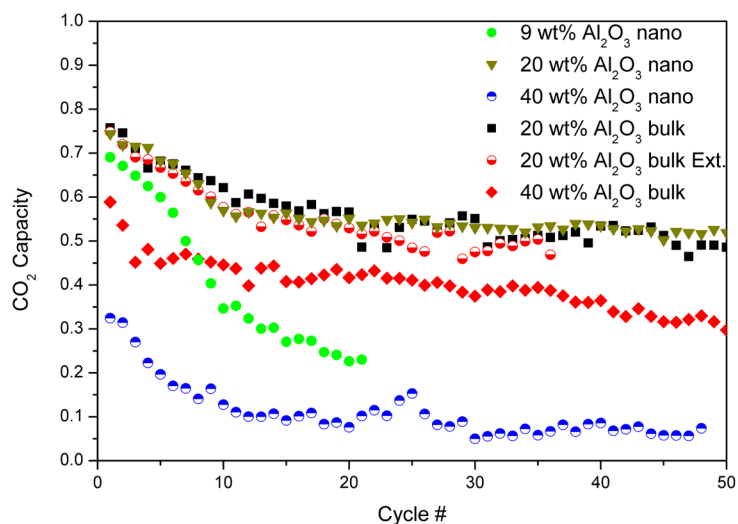

**Figure S4.** Absorption data comparing the influence of  $\text{Al}_2\text{O}_3$  content, initial particle size, and extended calcination/carbonation time (1h/1h) up to 50 calcination-carbonation cycles.

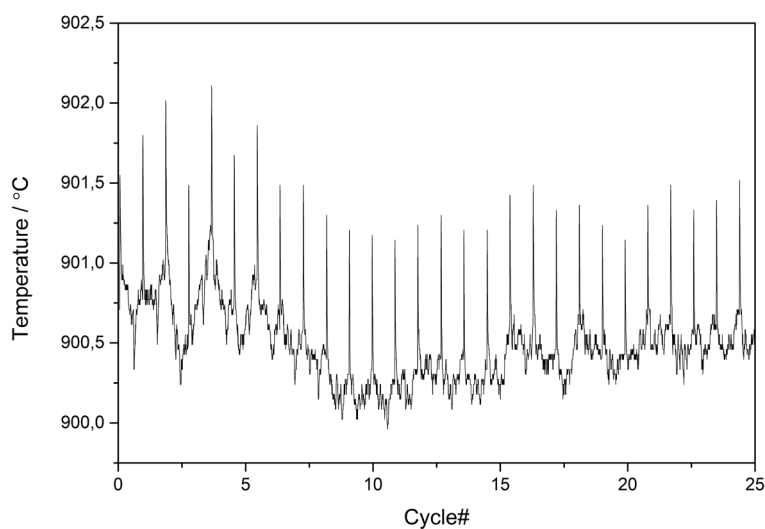

**Figure S5.** Temperature data on  $\text{CaCO}_3\text{-Al}_2\text{O}_3$  (20 wt%) during the first 25  $\text{CO}_2$  cycles highlighting especially the temperature increase on  $\text{CO}_2$  absorption (carbonation).

## Reaction kinetics

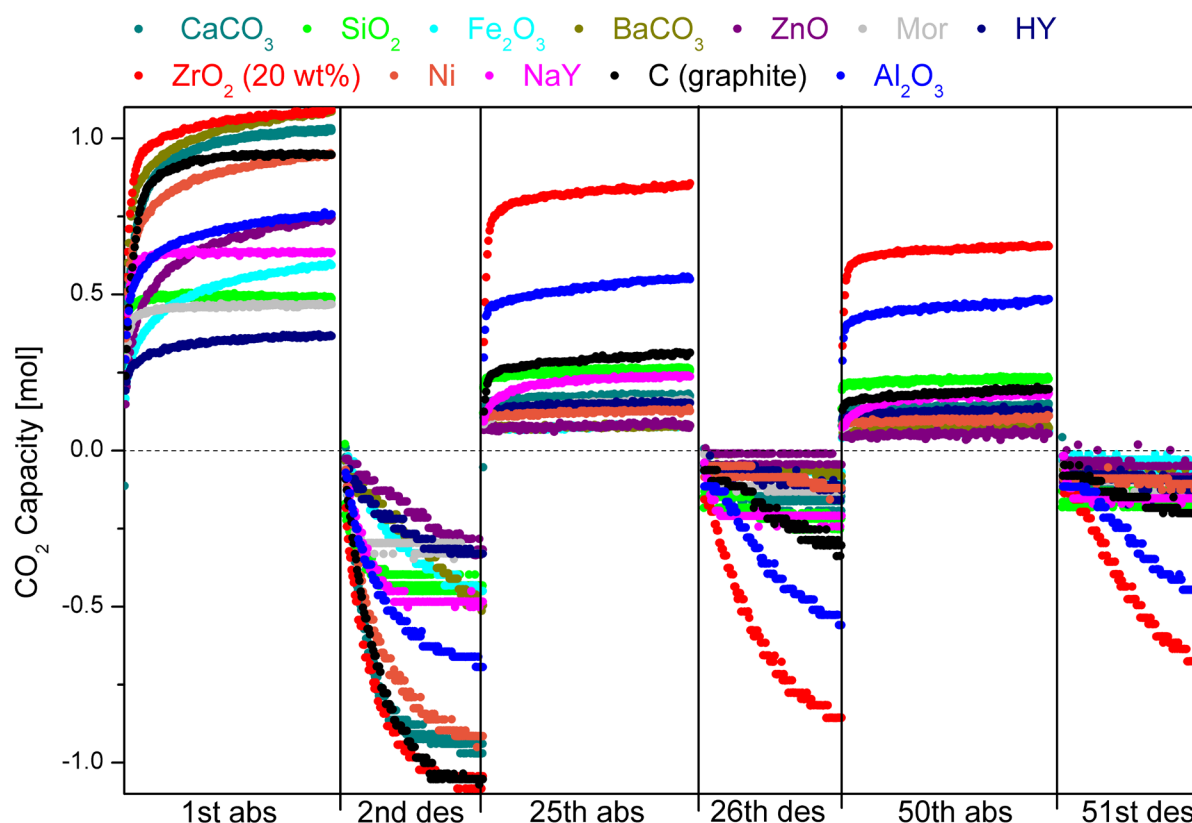

**Figure S6.** Comparison of the calcination/carbonation kinetics of all samples at the initial, middle, and final stage of the 50 cycles. The calcination/carbonation (des/abs) cycle is given on the *x*-axis.

During the first absorption and second desorption the pristine  $\text{CaCO}_3$ ,  $\text{ZrO}_2$ , graphite, and Ni samples possess the fastest reaction kinetics. The  $\text{BaCO}_3$  sample shows a fast first absorption, but the following desorption kinetics are very slow. After 25 cycles, it is clear that the  $\text{ZrO}_2$  (20 wt%) is superior to the remainder of the samples. However, the graphite and  $\text{SiO}_2$  samples also demonstrate fast kinetics, but a low overall capacity. In the 50<sup>th</sup> cycle, it is noteworthy how the desorption kinetics of the  $\text{ZrO}_2$  (20 wt%) sample has decreased, whereas the absorption kinetics remain fast (~95 % of the reached capacity within 3.5 minutes). For the remainder of the series, the absorption kinetics seem to be fast as a plateau, limited by the capacity, is reached within 10 minutes for all of them. However, desorption seems to be slow. Generally, the desorption kinetics are slower compared to absorption. The latter makes a build-up of  $\text{CaCO}_3$  possible. However, as identified from PXD (cf. Powder X-ray Diffraction),  $\text{CaO}$  is a main component in the samples after the final absorption measurement.

## Powder X-ray Diffraction

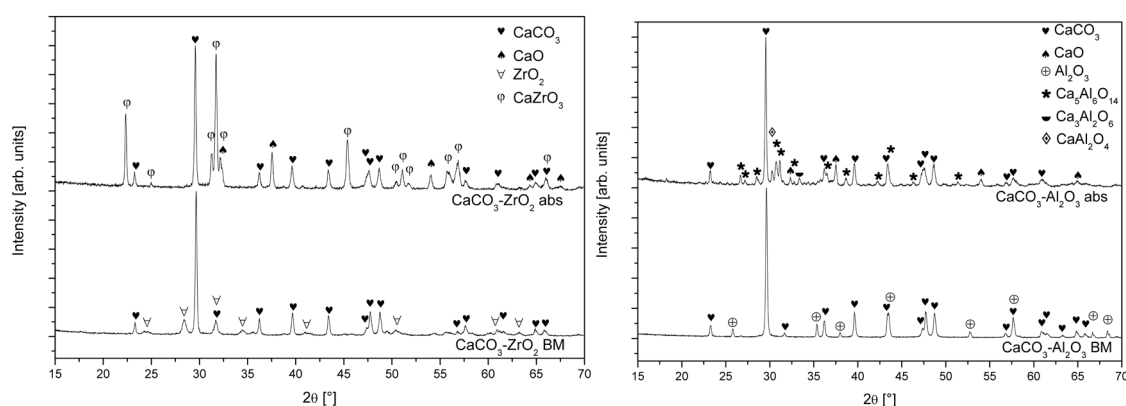

**Figure S7.** PXD data of *left*: CaCO<sub>3</sub>-ZrO<sub>2</sub> (20 wt%) and *right*: CaCO<sub>3</sub>-Al<sub>2</sub>O<sub>3</sub> (20 wt%) of the as-milled and absorbed samples after 50 calcination/carbonation cycles showing the formation of ternary compounds.

After 50 absorption/desorption cycles reveal that CaO is present after the attempt to absorb CO<sub>2</sub>, hence explaining the decreasing CO<sub>2</sub> capacity of the samples. However, multiple reactions are also observed between the CaCO<sub>3</sub> and the additive, *i.e.* in the cases of BaCO<sub>3</sub>, Fe<sub>2</sub>O<sub>3</sub>, SiO<sub>2</sub>, Zeolite Y, Zeolite Mordenite, and C (graphite):

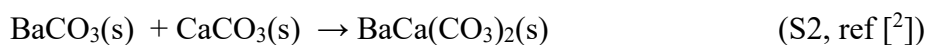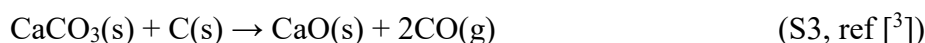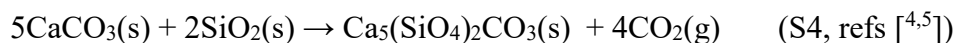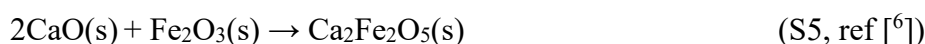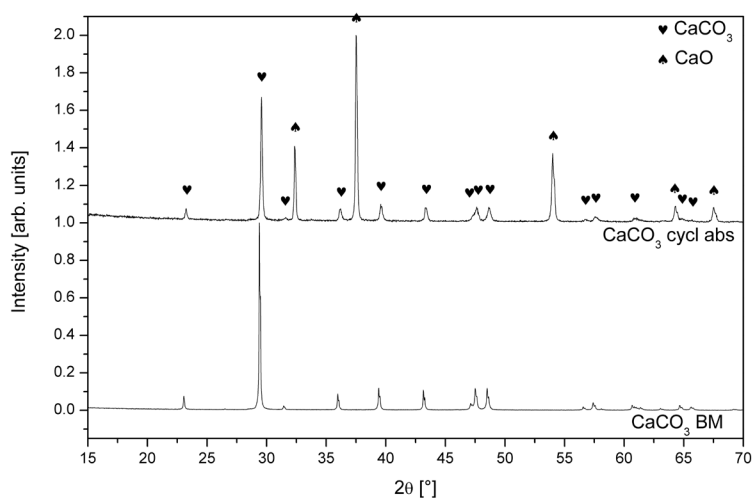

**Figure S8.** PXD data of as-prepared and after 50 calcination/carbonation cycles ending in the absorbed state of the CaCO<sub>3</sub> sample.

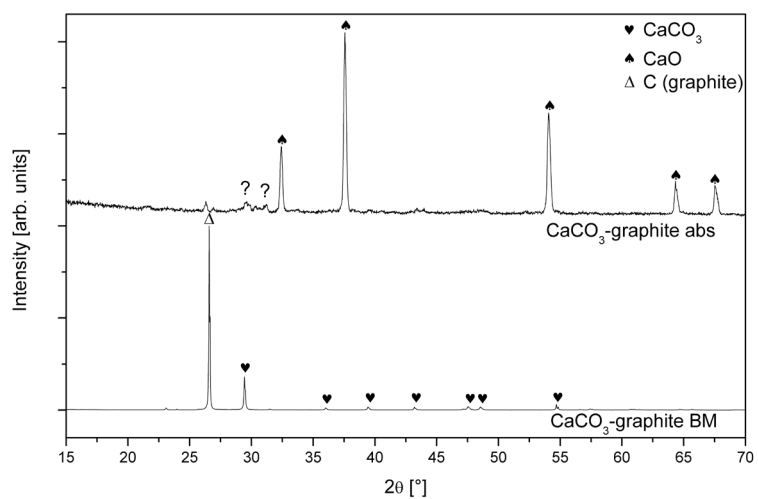

**Figure S9.** PXD data of as-prepared and after 50 calcination/carbonation cycles ending in the absorbed state of the  $\text{CaCO}_3$ -Graphite sample.

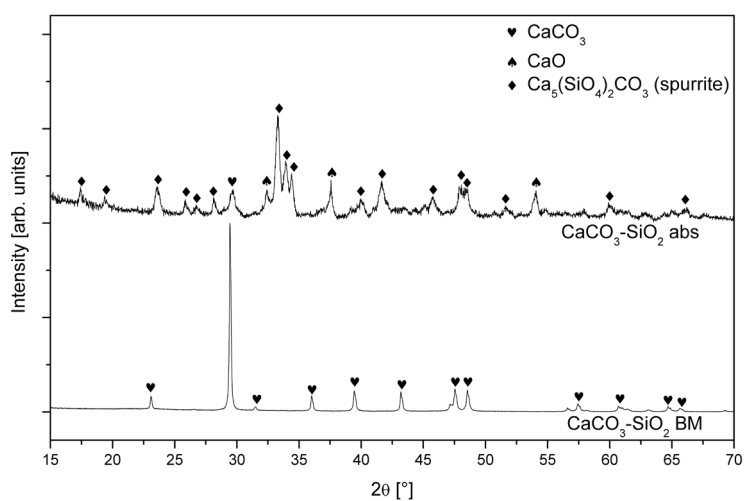

**Figure S10.** PXD data of as-prepared and after 50 calcination/carbonation cycles ending in the absorbed state of the  $\text{CaCO}_3$ - $\text{SiO}_2$  sample.

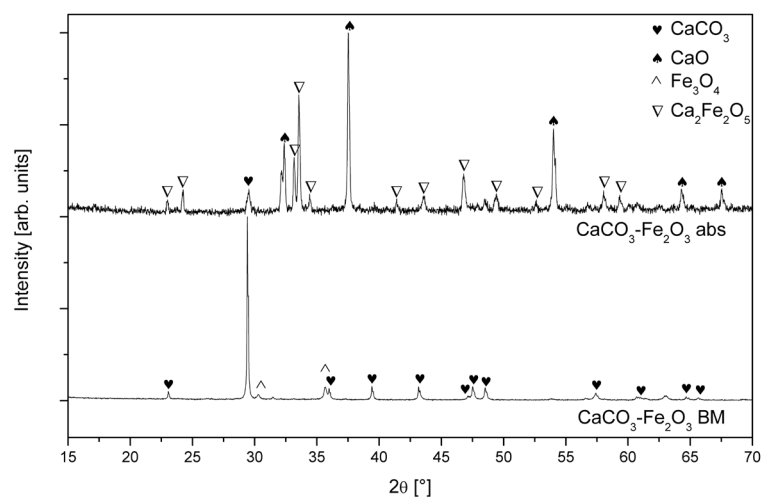

**Figure S11.** PXD data of as-prepared and after 50 calcination/carbonation cycles ending in the absorbed state of the  $\text{CaCO}_3\text{-Fe}_2\text{O}_3$  sample.

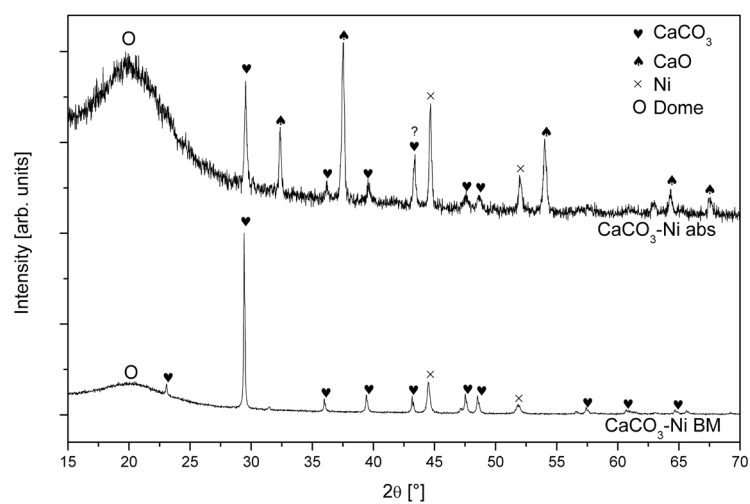

**Figure S12.** PXD data of as-prepared and after 50 calcination/carbonation cycles ending in the absorbed state of the  $\text{CaCO}_3\text{-Ni}$  sample.

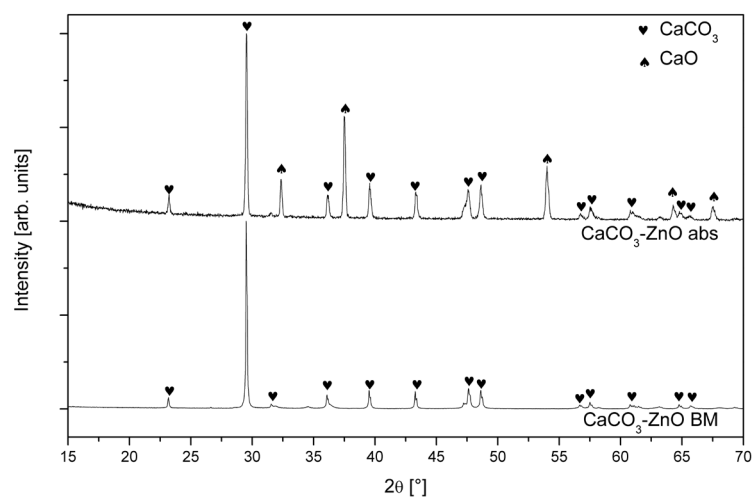

**Figure S13.** PXD data of as-prepared and after 50 calcination/carbonation cycles ending in the absorbed state of the  $\text{CaCO}_3\text{-ZnO}$  sample.

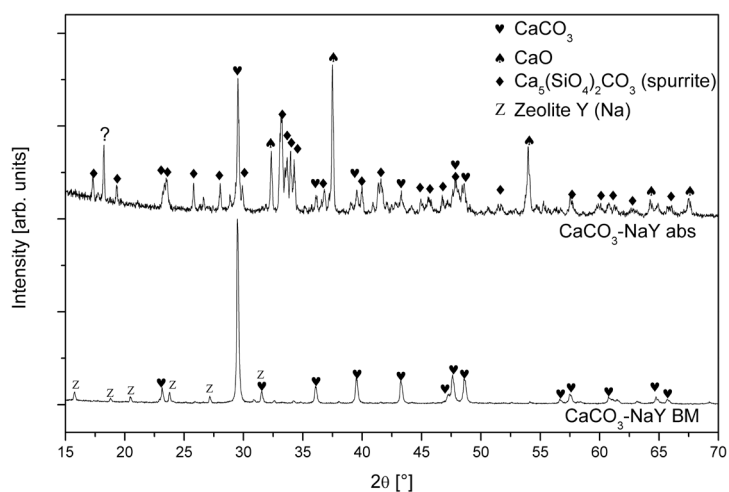

**Figure S14.** PXD data of as-prepared and after 50 calcination/carbonation cycles ending in the absorbed state of the  $\text{CaCO}_3\text{-Zeolite Y (Na)}$  sample.

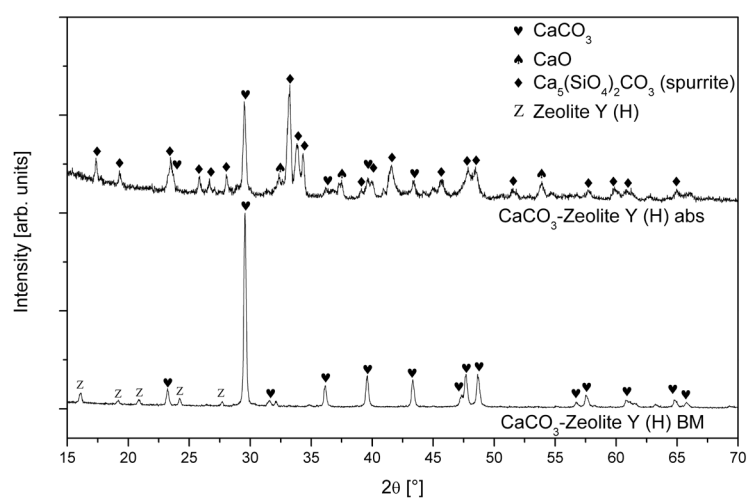

**Figure S15.** PXD data of as-prepared and after 50 calcination/carbonation cycles ending in the absorbed state of the  $\text{CaCO}_3$ -Zeolite Y (H) sample.

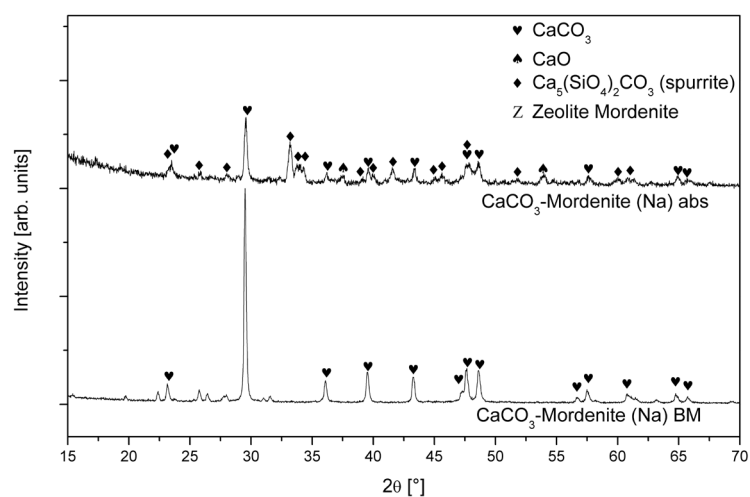

**Figure S16.** PXD data of as-prepared and after 50 calcination/carbonation cycles ending in the absorbed state of the  $\text{CaCO}_3$ -Mordenite (Na) sample.

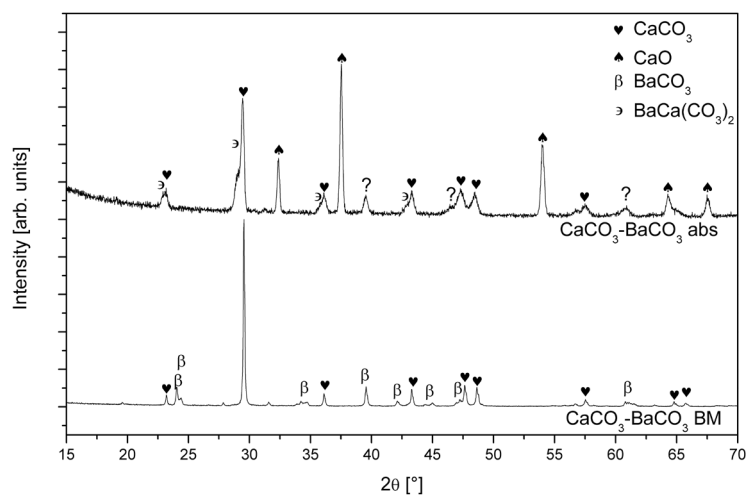

**Figure S17.** PXD data of as-prepared and after 50 calcination/carbonation cycles ending in the absorbed state of the  $\text{CaCO}_3\text{-BaCO}_3$  sample.

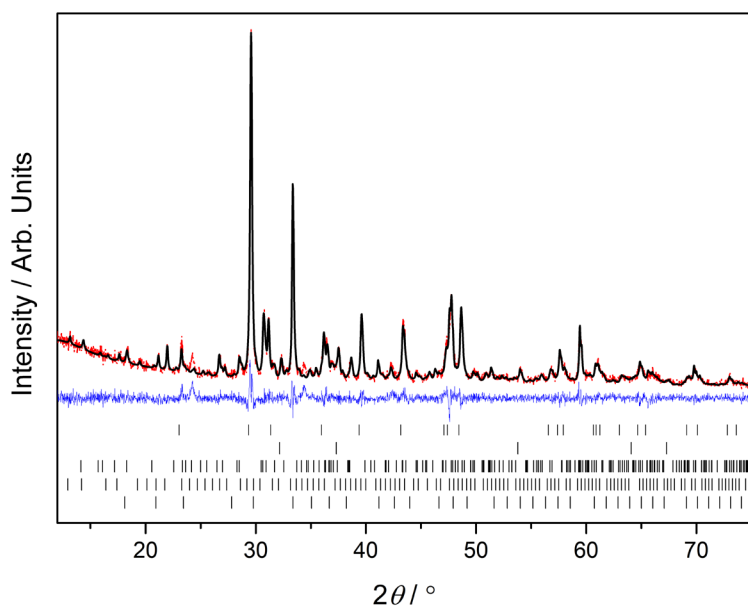

**Figure S18.** Rietveld refinement on PXD data on  $\text{CaCO}_3\text{-Al}_2\text{O}_3$  (20 wt%) at room temperature after 500  $\text{CO}_2$  cycles.  $Y_{\text{obs}}$ : red;  $Y_{\text{calc}}$ : black, and  $Y_{\text{diff}}$ : blue.  $hkl$  markers (bottom singular markers) from top to bottom:  $\text{CaCO}_3$ ,  $\text{CaO}$ ,  $\text{Ca}_5\text{Al}_6\text{O}_{14}$ ,  $\text{Ca}_9\text{Al}_6\text{O}_{18}$  and  $\text{Ca}_{12}\text{Al}_{14}\text{O}_{33}$ .  $R_{\text{wp}} = 10.467\%$ .

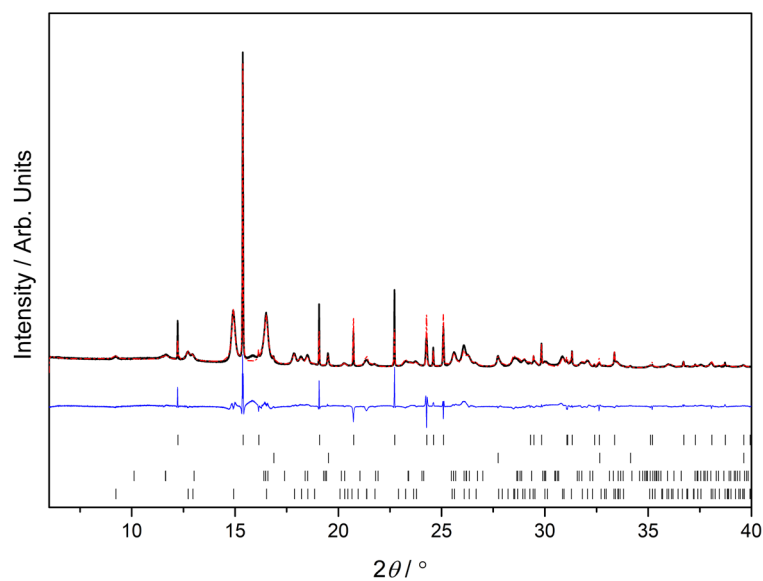

**Figure S19.** Rietveld refinement on *in situ* SR PXD data on  $\text{CaCO}_3\text{-ZrO}_2$  (40 wt%) at  $T = 900\text{ }^\circ\text{C}$  and  $t \sim 0$  min.  $Y_{\text{obs}}$ : red;  $Y_{\text{calc}}$ : black, and  $Y_{\text{diff}}$ : blue. *hkl* markers (bottom singular markers) from top to bottom:  $\text{CaCO}_3$ ,  $\text{CaO}$ ,  $\text{CaZrO}_3$ , and  $\text{ZrO}_2$ .  $R_{\text{wp}} = 9.881\text{ } \%$ .

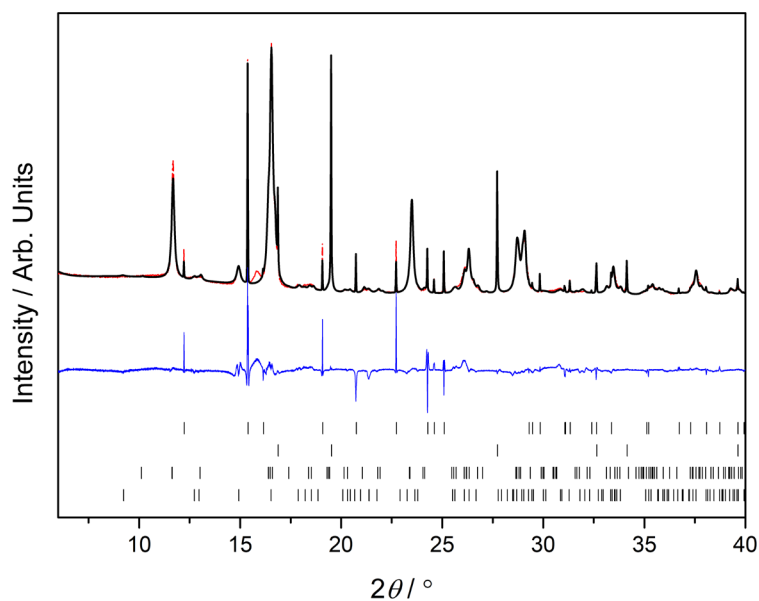

**Figure S20.** Rietveld refinement on *in situ* SR PXD data on  $\text{CaCO}_3\text{-ZrO}_2$  (40 wt%) at  $T = 900\text{ }^\circ\text{C}$  and  $t \sim 25$  min.  $Y_{\text{obs}}$ : red;  $Y_{\text{calc}}$ : black, and  $Y_{\text{diff}}$ : blue. *hkl* markers (bottom singular markers) from top to bottom:  $\text{CaCO}_3$ ,  $\text{CaO}$ ,  $\text{CaZrO}_3$ , and  $\text{ZrO}_2$ .  $R_{\text{wp}} = 7.863\text{ } \%$ .

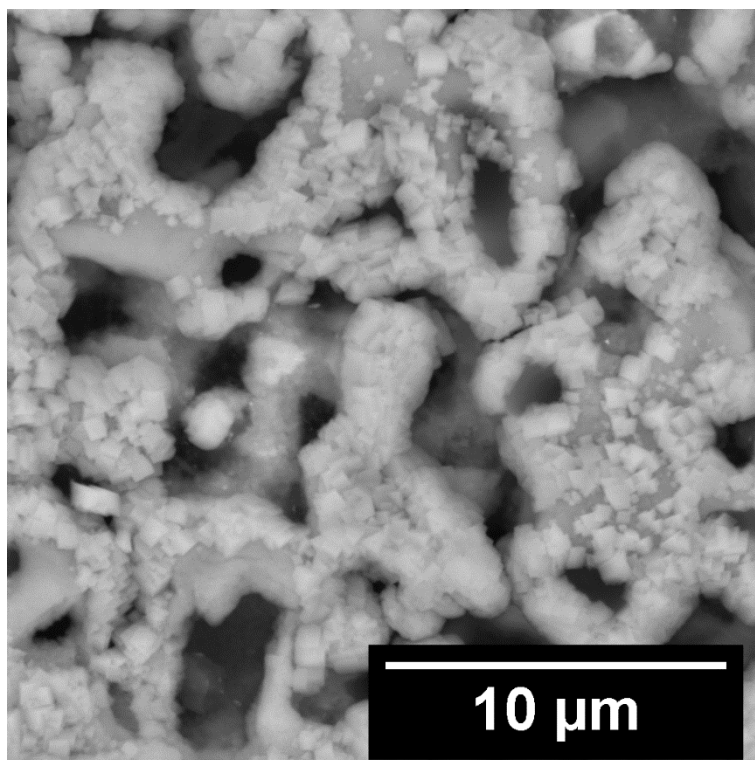

**Figure S21.** SEM image of neat CaCO<sub>3</sub> cycled 50 times, highlighting the small particles present on the surface of a 'worm'-like morphology structure.

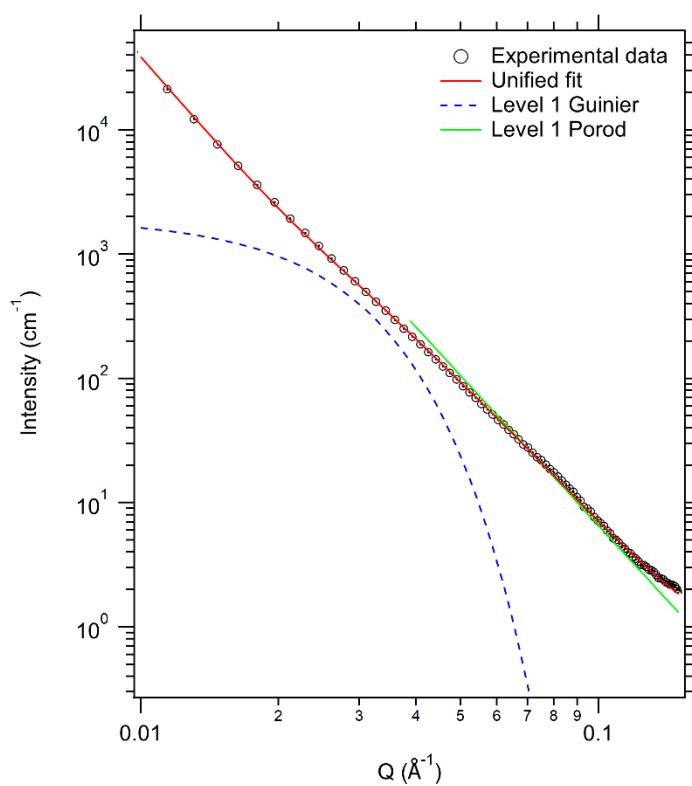

**Figure S22.** Representative fit to SAXS data using the Unified model for CaCO<sub>3</sub> 50 cycles (des). The Guinier and Porod (slope = -4) regions are shown for Level 1, from where the specific surface area (SSA) was determined.

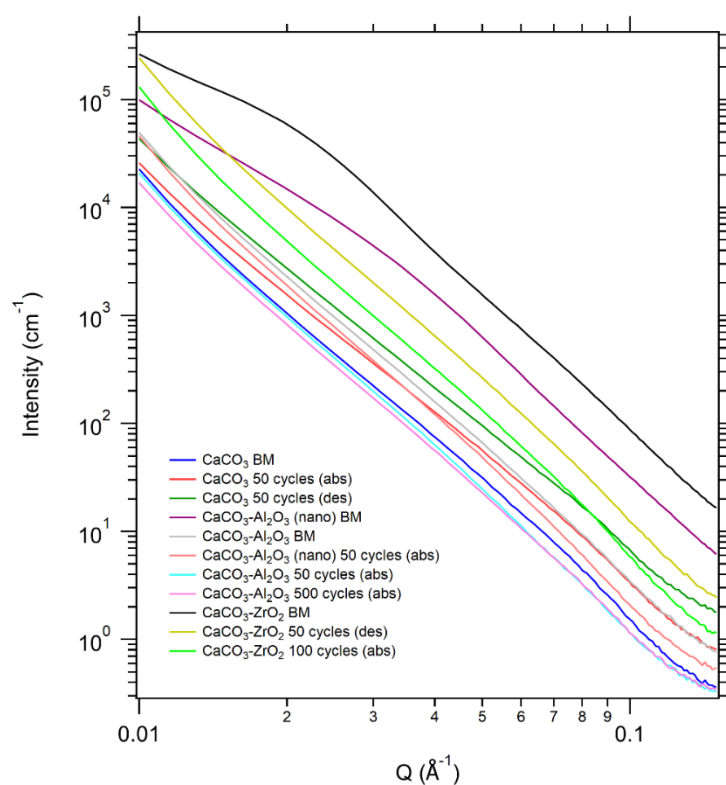

**Figure S23.** SAXS data for ballmilled (BM) and cycled materials in the absorbed (abs) or desorbed (des) state.

## References

- 1 L. L. Y. Chang, *J. Geol.*, 1965, **73**, 346–368.
- 2 A. Grandjean and G. Leturcq, *J. Nucl. Mater.*, 2005, **345**, 11–18.
- 3 Y. Kashiwaya, R. Suzuki and K. Ishii, *ISIJ Int.*, 2011, **51**, 1213–1219.
- 4 H. Bolio-Arceo and F. P. Glasser, *Cem. Concr. Res.*, 1990, **20**, 301–307.
- 5 F. P. Glasser, *Cem. Concr. Res.*, 1973, **3**, 23–28.
- 6 M. Ismail, W. Liu, M. S. C. Chan, M. T. Dunstan and S. A. Scott, *Energy Fuels*, 2016, **30**, 6220–6232.
